# Supplementary figures and images for: Oxidation of Volatile Organic Compounds as the Major Source of Formic Acid in a Mixed Forest Canopy
Source: PubMed Central journal article supplement — Geophys Res Lett. 2019 Mar 12;46(5):2940–8. doi: 10.1029/2018GL081526 (PMC6487833; doi:10.1029/2018gl081526), 2019-03-12

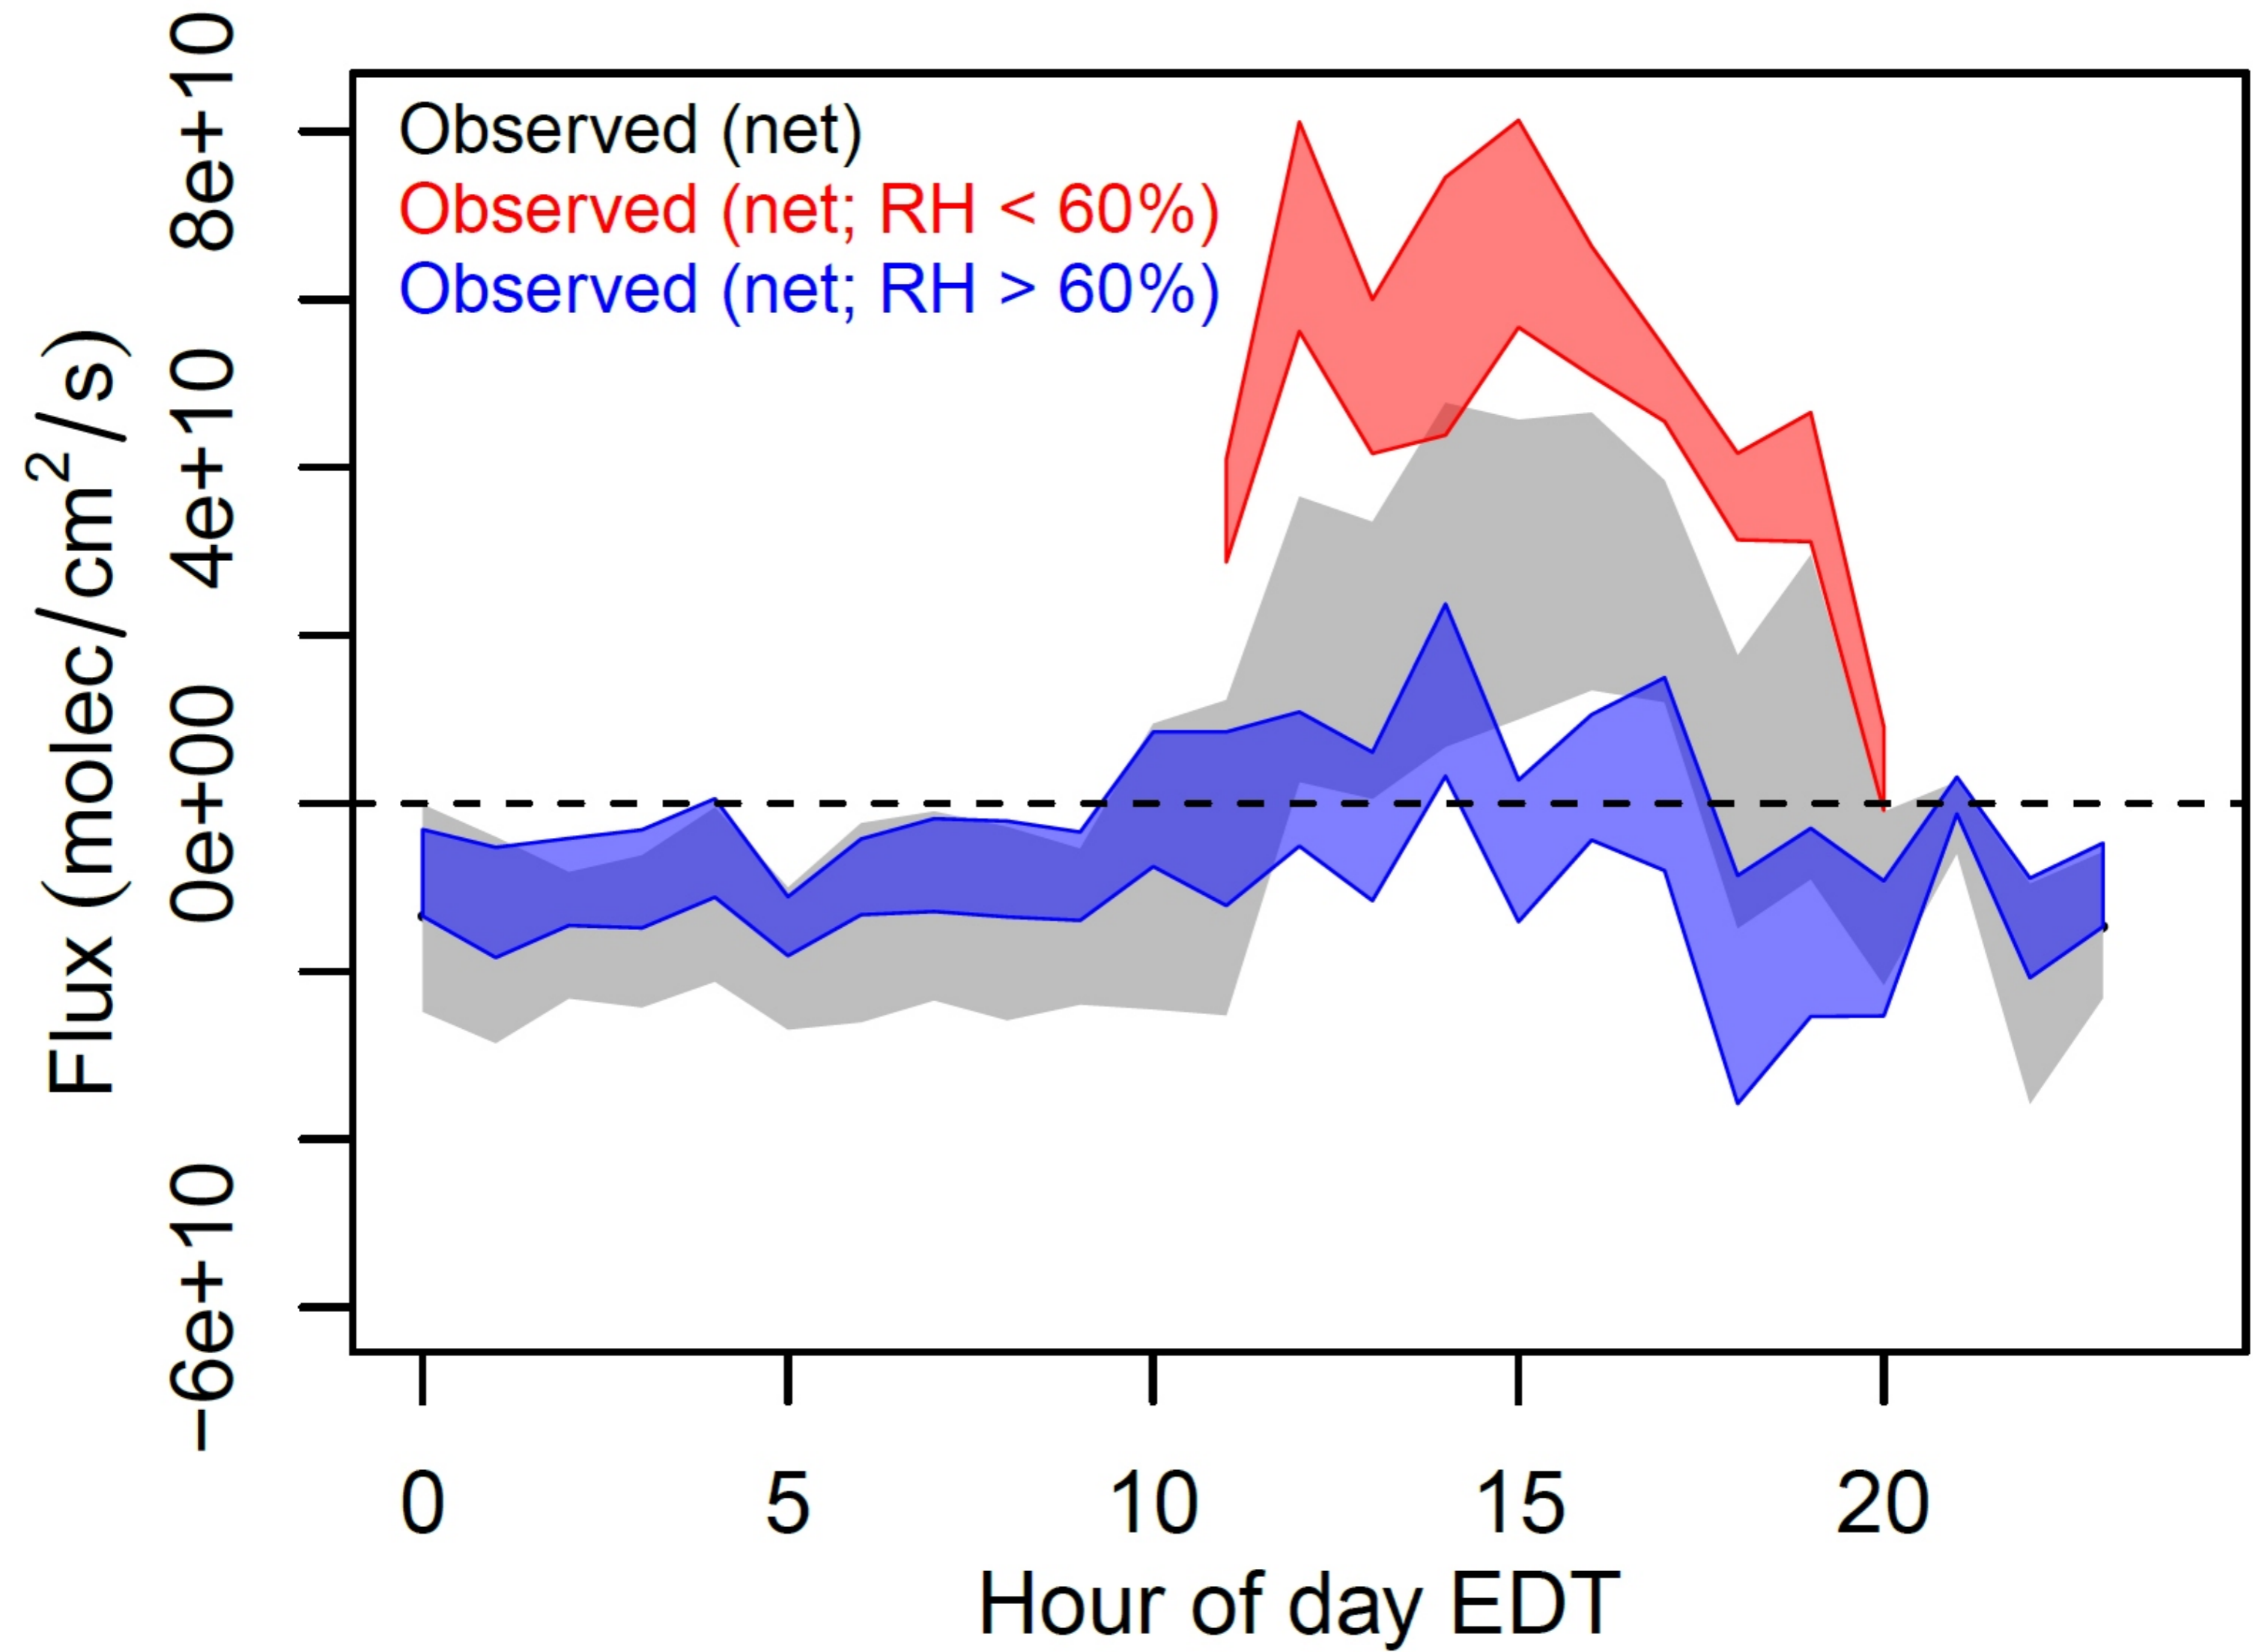

Supplement: GRL-46-2940-s002.pdf [file GRL-46-2940-s002.pdf]

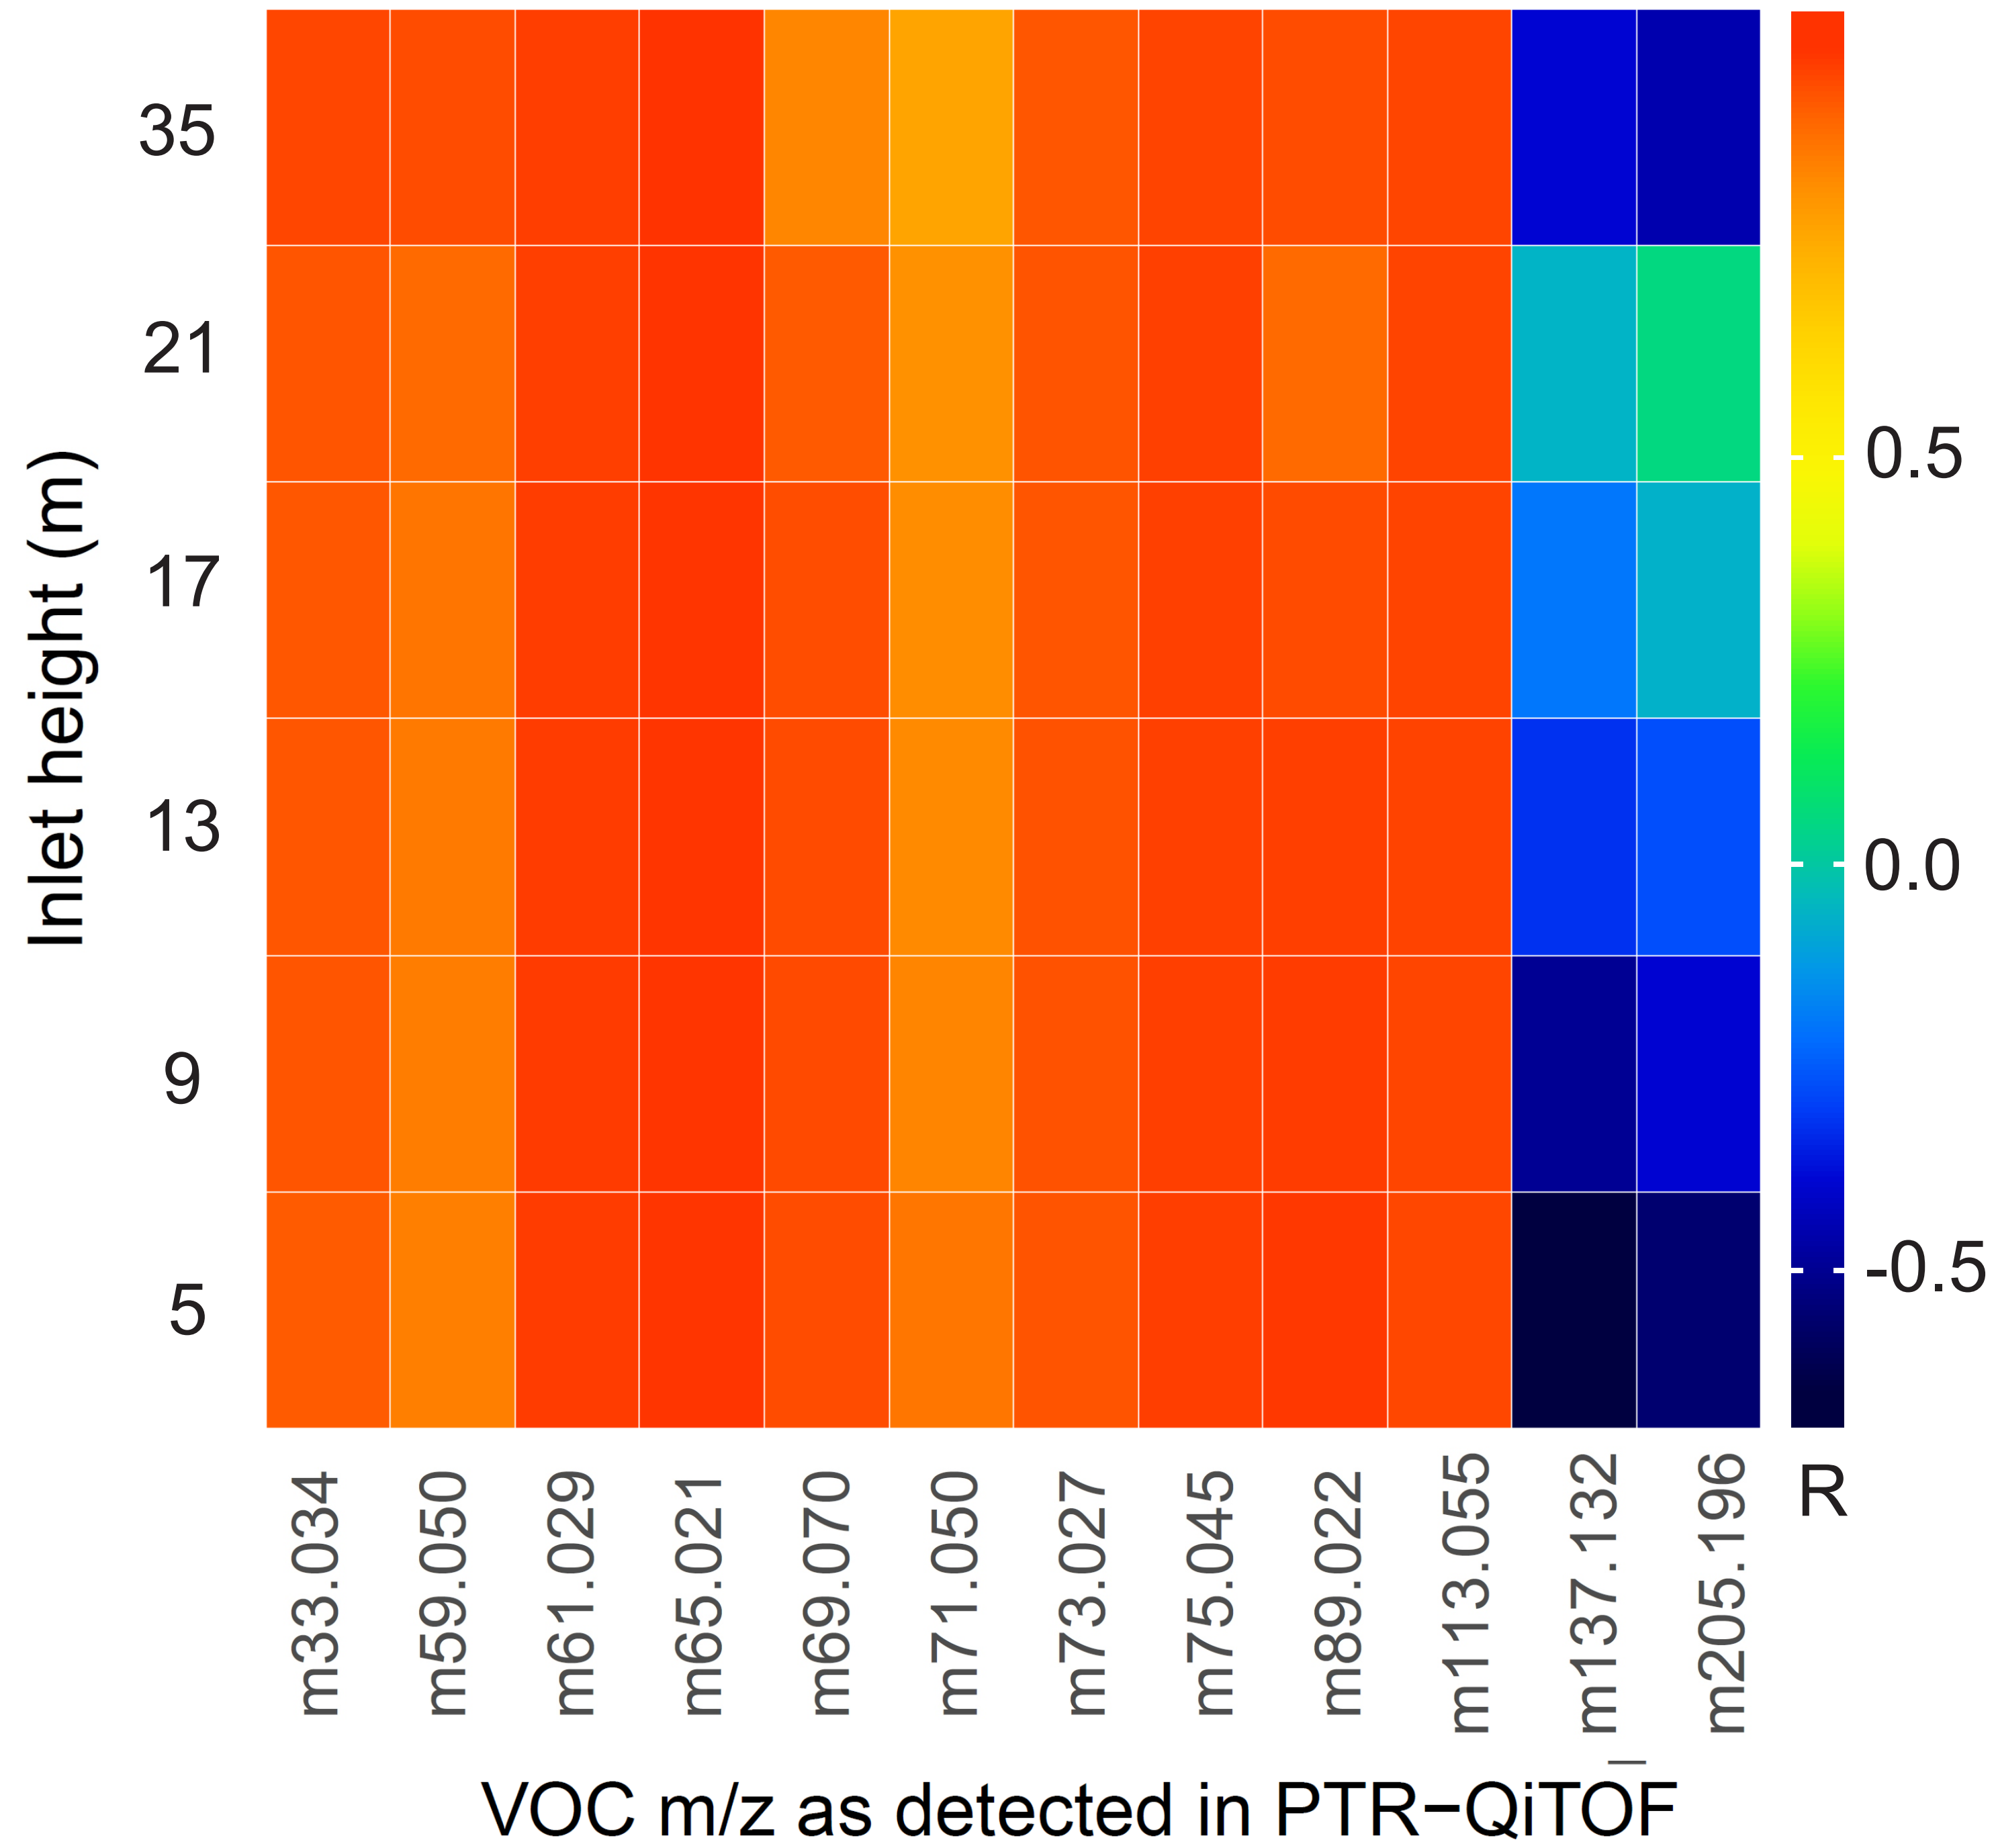

Supplement: GRL-46-2940-s004.pdf [file GRL-46-2940-s004.pdf]
